# Supplementary material
Source: PubMed Central journal article supplement (PMC4527358)
Supplement: NIHMS637343-supplement-supplementary_appendix.pdf [file NIHMS637343-supplement-supplementary_appendix.pdf]

**SUPPLEMENT TO  
“A LASSO FOR HIERARCHICAL INTERACTIONS”**

BY JACOB BIEN\*, JONATHAN TAYLOR† AND ROBERT TIBSHIRANI‡  
*Stanford University*

**1. Effect of constraint.**

For notational simplicity, we write  $r(\beta^+, \beta^-, \Theta) \in \mathbb{R}^n$  to denote the residuals,  $y - \hat{y}(\beta^+, \beta^-, \Theta)$ , as a function of the parameters. The strong Hierarchical Lasso problem is the following:

$$\begin{aligned} \text{Minimize}_{\beta^+, \beta^-, \Theta} \quad & \frac{1}{2} \|r(\beta^+, \beta^-, \Theta)\|^2 + \lambda_1 \mathbf{1}^T (\beta^+ + \beta^-) + \lambda_2 \sum_j \|\Theta_j\|_1 \\ \text{s.t.} \quad & \|\Theta_j\|_1 \leq \beta_j^+ + \beta_j^- \text{ and } \beta_j^+ \geq 0, \beta_j^- \geq 0 \text{ for each } j, \Theta = \Theta^T. \end{aligned}$$

The Lagrangian is

$$\begin{aligned} L(\phi; \alpha, S, \gamma^\pm, U) &= \frac{1}{2} \|r(\beta^+, \beta^-, \Theta)\|^2 + \lambda_1 \mathbf{1}^T (\beta^+ + \beta^-) + \lambda_2 \langle U, \Theta \rangle \\ &\quad + \sum_j \alpha_j (U_j^T \Theta_j - \beta_j^+ - \beta_j^-) - \gamma_j^+ \beta_j^+ - \gamma_j^- \beta_j^- + \langle S, \Theta - \Theta^T \rangle \\ &= \frac{1}{2} \|r(\beta^+, \beta^-, \Theta)\|^2 + (\lambda_1 \mathbf{1} - \alpha - \gamma^+)^T \beta^+ + (\lambda_1 \mathbf{1} - \alpha - \gamma^-)^T \beta^- \\ &\quad + \langle S - S^T + \text{diag}(\lambda_2 \mathbf{1} + \alpha) U, \Theta \rangle, \end{aligned}$$

where  $\alpha, \gamma^\pm, S, U$  are dual variables. According to the KKT conditions,  $(\hat{\phi}; \hat{\alpha}, \hat{S}, \hat{\gamma}^\pm, \hat{U})$  is an optimal primal-dual pair if and only if

$$\begin{aligned} \pm x_j^T r(\hat{\beta}^+, \hat{\beta}^-, \hat{\Theta}) &= \lambda_1 - \hat{\alpha}_j - \hat{\gamma}_j^\pm \\ (x_j * x_k)^T r(\hat{\beta}^+, \hat{\beta}^-, \hat{\Theta})/2 &= (\lambda_2 + \hat{\alpha}_j) \hat{U}_{jk} + \hat{S}_{jk} - \hat{S}_{kj} \\ 0 = \hat{\beta}_j^\pm \hat{\gamma}_j^\pm \quad 0 &= \hat{\alpha}_j (\|\hat{\Theta}_j\|_1 - \hat{\beta}_j^+ - \hat{\beta}_j^-) \\ \hat{\Theta} = \hat{\Theta}^T, \quad \hat{\beta}^\pm \geq 0, \quad \|\hat{\Theta}_j\|_1 &\leq \hat{\beta}_j^+ + \hat{\beta}_j^- \quad \hat{\alpha}, \hat{\gamma}^\pm \geq 0 \\ \hat{U}_{jk} &= \begin{cases} \text{sign}(\hat{\Theta}_{jk}) & \hat{\Theta}_{jk} \neq 0 \\ \in [-1, 1] & \hat{\Theta}_{jk} = 0. \end{cases} \end{aligned}$$

---

\*Supported in part by the Gerald J. Lieberman Fellowship

†Supported by National Science Foundation Grant DMS-0906801 and AFOSR Grant 113039

‡Supported by National Science Foundation Grant DMS-9971405 and National Institutes of Health Contract N01-HV-28183

Now, letting  $r^{(-j)} = r(\hat{\beta}^+, \hat{\beta}^-, \hat{\Theta}) + (\hat{\beta}_j^+ - \hat{\beta}_j^-)x_j$  and recalling that  $\|x_j\|^2 = 1$ , there are three cases to consider:

1.  $\hat{\beta}_j^+ \geq 0, \hat{\beta}_j^- = 0$ :

$$x_j^T(r^{(-j)} - \hat{\beta}_j^+ x_j) = \lambda_1 - \hat{\alpha}_j - \hat{\gamma}_j^+ \implies \hat{\beta}_j^+ = [x_j^T r^{(-j)} - (\lambda_1 - \hat{\alpha}_j)]_+$$

Note that this case applies when  $x_j^T r^{(-j)} \geq \lambda_1 - \hat{\alpha}_j$ . Thus, in this case  $\hat{\beta}_j^+ - \hat{\beta}_j^- = \mathcal{S}(x_j^T r^{(-j)}, \lambda_1 - \hat{\alpha}_j)$ .

2.  $\hat{\beta}_j^+ = 0, \hat{\beta}_j^- \geq 0$ :

$$-x_j^T(r^{(-j)} + \hat{\beta}_j^- x_j) = \lambda_1 - \hat{\alpha}_j - \hat{\gamma}_j^- \implies \hat{\beta}_j^- = [-x_j^T r^{(-j)} - (\lambda_1 - \hat{\alpha}_j)]_+$$

Note that this case applies when  $x_j^T r^{(-j)} \leq -(\lambda_1 - \hat{\alpha}_j)$ . Thus, once again  $\hat{\beta}_j^+ - \hat{\beta}_j^- = \mathcal{S}(x_j^T r^{(-j)}, \lambda_1 - \hat{\alpha}_j)$ .

3.  $\hat{\beta}_j^+ > 0, \hat{\beta}_j^- > 0$  ( $\implies \hat{\gamma}_j^+ = 0, \hat{\gamma}_j^- = 0$ )

$$\pm x_j^T(r^{(-j)} - (\hat{\beta}_j^+ - \hat{\beta}_j^-)x_j) = \lambda_1 - \hat{\alpha}_j \implies \hat{\beta}_j^+ - \hat{\beta}_j^- = x_j^T r^{(-j)}.$$

Note that this case applies when  $\hat{\alpha}_j = \lambda_1$ , so trivially  $\hat{\beta}_j^+ - \hat{\beta}_j^- = \mathcal{S}(x_j^T r^{(-j)}, \lambda_1 - \hat{\alpha}_j)$ .

Thus, we have shown that  $\hat{\beta}_j^+ - \hat{\beta}_j^- = \mathcal{S}(x_j^T r^{(-j)}, \lambda_1 - \hat{\alpha}_j)$ .

We can get rid of  $\hat{S}$  by rewriting the subgradient equation involving it as

$$(x_j * x_k)^T r(\hat{\beta}^+, \hat{\beta}^-, \hat{\Theta}) = (2\lambda_2 + \hat{\alpha}_j + \hat{\alpha}_k)\hat{U}_{jk}$$

(note that symmetry in  $\hat{\Theta}$  implies that there exists a symmetric  $\hat{U}$ ).

Now, letting  $r^{(-jk)} = r(\hat{\beta}^+, \hat{\beta}^-, \hat{\Theta}) + (x_j * x_k)(\hat{\Theta}_{jk} + \hat{\Theta}_{kj})/2$ , we get

$$\hat{\Theta}_{jk}\|x_j * x_k\|^2 = (x_j * x_k)^T r^{(-jk)} - (2\lambda_2 + \hat{\alpha}_j + \hat{\alpha}_k)\hat{U}_{jk} = \mathcal{S}((x_j * x_k)^T r^{(-jk)}, 2\lambda_2 + \hat{\alpha}_j + \hat{\alpha}_k).$$

This completes the proof for the Strong Hierarchical Lasso. Note that in the Weak Hierarchical Lasso case, the KKT conditions are identical except we do not have the constraint  $\hat{\Theta} = \hat{\Theta}^T$  and we take  $\hat{S} = 0$ . Thus, the relevant condition is simply

$$(x_j * x_k)^T r(\hat{\beta}^+, \hat{\beta}^-, \hat{\Theta}) = 2(\lambda_2 + \hat{\alpha}_j)\hat{U}_{jk} = 2(\lambda_2 + \hat{\alpha}_k)\hat{U}_{kj}.$$

Note that the second equality implies that  $\hat{U}_{jk}\hat{U}_{kj} \geq 0$  (since  $\hat{\alpha} \geq 0$ ) and that if  $|U_{jk}| = 1$ , then  $\hat{\alpha}_j \leq \hat{\alpha}_k$  and vice versa. Rearranging terms, we have

$$\begin{aligned} (\hat{\Theta}_{jk} + \hat{\Theta}_{kj})\|x_j * x_k\|^2/2 &= (x_j * x_k)^T r^{(-jk)} - 2(\lambda_2 + \hat{\alpha}_j)\hat{U}_{jk} \\ &= (x_j * x_k)^T r^{(-jk)} - 2(\lambda_2 + \hat{\alpha}_k)\hat{U}_{kj}. \end{aligned}$$

Now,  $\widehat{U}_{jk}\widehat{U}_{kj} \geq 0$  implies  $\widehat{\Theta}_{jk}\widehat{\Theta}_{kj} \geq 0$  which implies that  $(\widehat{\Theta}_{jk} + \widehat{\Theta}_{kj})/2$ , if nonzero, has the same sign as whichever of  $\widehat{\Theta}_{jk}$  or  $\widehat{\Theta}_{kj}$  (or both) is nonzero.

There are four cases:

1.  $\widehat{\Theta}_{jk} \neq 0, \widehat{\Theta}_{kj} = 0$ :

$$\begin{aligned} (\widehat{\Theta}_{jk} + \widehat{\Theta}_{kj})\|x_j * x_k\|^2/2 &= (x_j * x_k)^T r^{(-jk)} - 2(\lambda_2 + \hat{\alpha}_j) \cdot \text{sign}(\widehat{\Theta}_{jk}) \\ &= (x_j * x_k)^T r^{(-jk)} - 2(\lambda_2 + \hat{\alpha}_j) \cdot \text{sign}(\widehat{\Theta}_{jk} + \widehat{\Theta}_{kj}) \end{aligned}$$

and  $\hat{\alpha}_j \leq \hat{\alpha}_k$  since  $|\widehat{U}_{jk}| = 1$ .

2.  $\widehat{\Theta}_{jk} = 0, \widehat{\Theta}_{kj} \neq 0$ :

$$\begin{aligned} (\widehat{\Theta}_{jk} + \widehat{\Theta}_{kj})\|x_j * x_k\|^2/2 &= (x_j * x_k)^T r^{(-jk)} - 2(\lambda_2 + \hat{\alpha}_k) \cdot \text{sign}(\widehat{\Theta}_{kj}) \\ &= (x_j * x_k)^T r^{(-jk)} - 2(\lambda_2 + \hat{\alpha}_k) \cdot \text{sign}(\widehat{\Theta}_{jk} + \widehat{\Theta}_{kj}) \end{aligned}$$

and  $\hat{\alpha}_k \leq \hat{\alpha}_j$  since  $|\widehat{U}_{kj}| = 1$ .

3.  $\widehat{\Theta}_{jk} \neq 0, \widehat{\Theta}_{kj} \neq 0$ :

$$\begin{aligned} (\widehat{\Theta}_{jk} + \widehat{\Theta}_{kj})\|x_j * x_k\|^2/2 &= (x_j * x_k)^T r^{(-jk)} - 2(\lambda_2 + \hat{\alpha}_j) \cdot \text{sign}(\widehat{\Theta}_{jk}) \\ &= (x_j * x_k)^T r^{(-jk)} - 2(\lambda_2 + \hat{\alpha}_j) \cdot \text{sign}(\widehat{\Theta}_{jk} + \widehat{\Theta}_{kj}) \end{aligned}$$

and  $\hat{\alpha}_j = \hat{\alpha}_k$  since  $|\widehat{U}_{jk}| = |\widehat{U}_{kj}| = 1$ .

4.  $\widehat{\Theta}_{jk} = 0, \widehat{\Theta}_{kj} = 0$ :

$$\begin{aligned} (\widehat{\Theta}_{jk} + \widehat{\Theta}_{kj})\|x_j * x_k\|^2/2 &= 0 \\ &= \mathcal{S}((x_j * x_k)^T r^{(-jk)}, 2(\lambda_2 + \hat{\alpha}_j)) \\ &= \mathcal{S}((x_j * x_k)^T r^{(-jk)}, 2(\lambda_2 + \hat{\alpha}_k)) \end{aligned}$$

where the latter two equalities follow since  $|(x_j * x_k)^T r^{(-jk)}| \leq 2(\lambda_2 + \hat{\alpha}_j)$  and  $|(x_j * x_k)^T r^{(-jk)}| \leq 2(\lambda_2 + \hat{\alpha}_k)$ .

We can encapsulate all of this into a single, simple expression:

$$(\widehat{\Theta}_{jk} + \widehat{\Theta}_{kj})\|x_j * x_k\|^2/2 = \mathcal{S}((x_j * x_k)^T r^{(-jk)}, 2(\lambda_2 + \min\{\hat{\alpha}_j, \hat{\alpha}_k\})).$$

**2. Proof that (5) and (6) are equivalent.** We rewrite (5) in terms of  $\beta = \beta^+ - \beta^-$  rather than  $\beta^-$ :

$$\begin{aligned} \underset{\beta_0 \in \mathbb{R}, \beta, \beta^+ \in \mathbb{R}^p, \Theta \in \mathbb{R}^{p \times p}}{\text{Minimize}} \quad & q(\beta_0, \beta, \Theta) + \lambda 1^T(2\beta^+ - \beta) + \frac{\lambda}{2} \|\Theta\|_1 \\ \text{s.t.} \quad & \Theta = \Theta^T, \beta^+ \geq 0, \beta^+ \geq \beta, \|\Theta_j\|_1 \leq 2\beta_j^+ - \beta_j \end{aligned}$$

or

$$\begin{aligned} & \underset{\beta_0 \in \mathbb{R}, \beta, \beta^+ \in \mathbb{R}^p, \Theta \in \mathbb{R}^{p \times p}}{\text{Minimize}} && q(\beta_0, \beta, \Theta) + \lambda \mathbf{1}^T (2\beta^+ - \beta) + \frac{\lambda}{2} \|\Theta\|_1 \\ & \text{s.t.} && \Theta = \Theta^T, \max\{[\beta_j]_+, (\|\Theta_j\|_1 + \beta_j)/2\} \leq \beta_j^+, \end{aligned}$$

where  $[\beta_j]_+ = \max\{\beta_j, 0\}$  is the positive part of  $\beta_j$ . This problem is the epigraph form of

$$\begin{aligned} & \underset{\beta_0 \in \mathbb{R}, \beta, \beta^+ \in \mathbb{R}^p, \Theta \in \mathbb{R}^{p \times p}}{\text{Minimize}} && q(\beta_0, \beta, \Theta) + \lambda \sum_{j=1}^p (\max\{2[\beta_j]_+, \|\Theta_j\|_1 + \beta_j\} - \beta_j) + \frac{\lambda}{2} \|\Theta\|_1 \\ & \text{s.t.} && \Theta = \Theta^T \end{aligned}$$

which reduces to (6) since  $2[\beta_j]_+ - \beta_j = |\beta_j|$ .

**3. Solving the logistic regression problem.** For notational simplicity, in this section we use  $\tilde{X}$  and  $\phi$  to denote the full data matrix and parameter combining both main effects and interactions. The binomial negative log-likelihood is

$$\ell(\beta_0, \phi) = - \sum_{i=1}^n [y_i \log p_i + (1 - y_i) \log(1 - p_i)]$$

where  $p_i = p_i(\beta_0, \phi) = 1/(1 + e^{-\beta_0 - \tilde{x}_i^T \phi})$ . Now,

$$\frac{\partial \ell(\beta_0, \phi)}{\partial \beta_0} = -\mathbf{1}^T (y - p) \quad \nabla_{\phi} \ell(\beta_0, \phi) = -\tilde{X}^T (y - p).$$

Thus, to solve  $\min_{\beta_0, \phi} \ell(\beta_0, \phi) + h(\phi)$ , we can use generalized gradient descent, which iteratively solves

$$\begin{pmatrix} \hat{\beta}_0^{(k)} \\ \hat{\phi}^{(k)} \end{pmatrix} = \arg \min_{\beta_0, \phi} \frac{1}{2t} \left\| \begin{pmatrix} \beta_0 \\ \phi \end{pmatrix} - \left[ \begin{pmatrix} \hat{\beta}_0^{(k-1)} \\ \hat{\phi}^{(k-1)} \end{pmatrix} + t \begin{pmatrix} \mathbf{1}^T [y - p(\hat{\beta}_0^{(k-1)}, \hat{\phi}^{(k-1)})] \\ \tilde{X}^T [y - p(\hat{\beta}_0^{(k-1)}, \hat{\phi}^{(k-1)})] \end{pmatrix} \right] \right\|^2 + h(\phi).$$

This separates into two parts:

$$\begin{aligned} \hat{\beta}_0^{(k)} &= \hat{\beta}_0^{(k-1)} + t \mathbf{1}^T [y - p(\hat{\beta}_0^{(k-1)}, \hat{\phi}^{(k-1)})] \\ \hat{\phi}^{(k)} &= \text{Prox}_{2t, h} \left( \hat{\phi}^{(k-1)} + t \tilde{X}^T [y - p(\hat{\beta}_0^{(k-1)}, \hat{\phi}^{(k-1)})] \right), \end{aligned}$$

where  $\text{Prox}_{2t, h}$  refers to the minimizer of (11). Looking at Algorithm 1, we see that this algorithm is identical except that for each  $k$  we update the estimate of the intercept and that we compute the residual as  $y - p(\hat{\beta}_0, \hat{\phi})$ . The “difficult” part of the computation is identical!

**4. ADMM for Strong Hierarchical Lasso.** The ADMM algorithm has three parts:

1. Update  $(\beta_0, \beta^\pm, \Theta)$  by solving

$$\begin{aligned} \text{Minimize}_{\beta_0 \in \mathbb{R}, \beta^\pm \in \mathbb{R}^p, \Theta \in \mathbb{R}^{p \times p}} \quad & q(\beta_0, \beta^+ - \beta^-, \Theta) + \lambda 1^T(\beta^+ + \beta^-) + \frac{\lambda}{2} \|\Theta\|_1 \\ & + \text{tr}[U(\Theta - \hat{\Omega})] + (\rho/2) \|\Theta - \hat{\Omega}\|_F^2 \\ \text{s.t.} \quad & \beta_j^+ \geq 0, \beta_j^- \geq 0 \text{ for } j = 1, \dots, p. \end{aligned}$$

As with Algorithm 1, we may apply generalized gradient descent and ONEROW to solve this, but replacing the argument  $\tilde{\Theta}_j$  of ONEROW with  $\delta \hat{\Theta}_j^{(k-1)} - t Z_{(j, \cdot)}^T \hat{r}^{(k-1)} + \rho(\hat{\Theta}_j^{(k-1)} - \hat{\Omega}) + U$ .

2. Update  $\Omega$  by solving

$$\text{Minimize}_{\Omega \in \mathbb{R}^{p \times p}} \quad \text{tr}[U(\hat{\Theta} - \Omega)] + (\rho/2) \|\hat{\Theta} - \Omega\|_F^2 \quad \text{s.t.} \quad \Omega = \Omega^T.$$

This has the analytic solution  $\hat{\Omega} \leftarrow \frac{1}{2}(\hat{\Theta} + \hat{\Theta}^T) + \frac{1}{2\rho}(U + U^T)$ .

3. Update  $U \leftarrow U + \rho(\hat{\Theta} - \hat{\Omega})$ :

Algorithm 2 in the paper gives the full algorithm.

DEPARTMENT OF BIOLOGICAL STATISTICS  
AND COMPUTATIONAL BIOLOGY  
AND DEPARTMENT OF STATISTICAL SCIENCE  
CORNELL UNIVERSITY  
ITHACA, NY 14853  
E-MAIL: jbien@cornell.edu

DEPARTMENT OF STATISTICS  
STANFORD UNIVERSITY  
STANFORD, CA 94305  
E-MAIL: jonathan.taylor@stanford.edu

DEPARTMENT OF HEALTH, RESEARCH, & POLICY  
AND DEPARTMENT OF STATISTICS  
STANFORD UNIVERSITY  
STANFORD, CA 94305  
E-MAIL: tibs@stanford.edu
